# Supplementary material for: Proteogenomic analysis of acute myeloid leukemia associates relapsed disease with reprogrammed energy metabolism both in adults and children
Source: PubMed Central journal article supplement (PMC9991901; doi:10.1038/s41375-022-01796-7), 2022-12-26
Supplement: 41375_2022_1796_MOESM1_ESM.pdf [file 41375_2022_1796_MOESM1_ESM.pdf]

1                                   **SUPPLEMENTAL INFORMATION FOR**  
2  
3                                   **Proteogenomic analysis of acute myeloid leukemia**  
4                                   **associates relapsed disease with reprogrammed energy**  
5                                   **metabolism both in adults and children**

6 Svea Stratmann<sup>1</sup>, Mattias Vesterlund<sup>2</sup>, Husen M. Umer<sup>2</sup>, Saeed Eshtad<sup>1,3</sup>, Aron Skaftason<sup>4</sup>,  
7 Morten Krogh Herlin<sup>5,6</sup>, Christer Sundström<sup>1</sup>, Anna Eriksson<sup>7</sup>, Martin Höglund<sup>7</sup>, Josefine  
8 Palle<sup>8</sup>, Jonas Abrahamsson<sup>9</sup>, Kirsi Jahnukainen<sup>10</sup>, Monica Cheng Munthe-Kaas<sup>11,12</sup>, Bernward  
9 Zeller<sup>12</sup>, Katja Pokrovskaja Tamm<sup>13</sup>, Cecilia Lindskog<sup>1</sup>, Lucia Cavelier<sup>1</sup>, Janne Lehtiö<sup>2</sup>, Linda  
10 Holmfeldt<sup>1,14,\*</sup>

11 <sup>1</sup>Department of Immunology, Genetics and Pathology, Science for Life Laboratory, Uppsala  
12 University, Sweden.

13 <sup>2</sup>Department of Oncology-Pathology, Karolinska Institutet, and Science for Life Laboratory,  
14 Stockholm, Sweden.

15 <sup>3</sup>Center for Hematology and Regenerative Medicine, Department of Medicine, Karolinska  
16 Institutet, Stockholm, Sweden.

17 <sup>4</sup>Department of Molecular Medicine and Surgery, Karolinska Institutet, Stockholm, Sweden

18 <sup>5</sup>Department of Clinical Medicine, Aarhus University, Denmark.

19 <sup>6</sup>Department of Pediatrics and Adolescent Medicine, Aarhus University, Denmark.

20 <sup>7</sup>Department of Medical Sciences, Uppsala University, Sweden.

21 <sup>8</sup>Department of Women's and Children's Health, Uppsala University, Sweden.

22 <sup>9</sup>Department of Pediatrics, Institute of Clinical Sciences, Sahlgrenska Academy at University  
23 of Gothenburg, Gothenburg, Sweden.

24 <sup>10</sup>Children's Hospital, University of Helsinki and Helsinki University Central Hospital,  
25 Helsinki, Finland.

26 <sup>11</sup>Norwegian Institute of Public Health, Oslo, Norway.

27 <sup>12</sup>Division of Pediatric and Adolescent Medicine, Oslo University Hospital, Oslo, Norway.

28 <sup>13</sup>Department of Oncology and Pathology, Karolinska Institutet and Karolinska University  
29 hospital, Sweden.

30 <sup>13</sup>The Beijer Laboratory, Uppsala, Sweden.

31 \*Corresponding author

32 **TABLE OF CONTENTS**

33 SUPPLEMENTAL METHODS..... 4

34 Cohort information ..... 4

35 Sample processing and in-depth proteomics by using HiRIEF LC-MS ..... 5

36 Peptide identification and quantification..... 6

37 Tumor purity assessment..... 7

38 Protein abundance analysis, and calculation and visualization of statistical significance..... 7

39 Gene ontology enrichment analysis..... 8

40 Immunoblotting..... 8

41 Assessment of mitochondrial DNA levels ..... 9

42 Proteogenomic identification of novel peptides and single amino acid alterations..... 9

43 Detection of fusion peptides..... 10

44 Identification of samples expressing the respective novel peptide..... 10

45 Manual curation of identified novel peptides ..... 11

46 Code availability..... 11

47 Sample usage for various analyses ..... 11

48 SUPPLEMENTAL TABLE LEGENDS ..... 12

49 Supplemental Table 1: Clinical information ..... 12

50 Supplemental Table 2: Study cohort sample characteristics ..... 12

51 Supplemental Table 3. Study cohort samples and applied analysis methods..... 12

52 Supplemental Table 4: BM-control sample characteristics..... 13

53 Supplemental Table 5: Antibody information..... 13

54 Supplemental Table 6. Expressed proteins and annotated genes in adult and pediatric R/PR AML. 13

55 Supplemental Table 7. Comprised metadata and multi-omics results overlay..... 13

56 Supplemental Table 8. Sample usage for various analyses..... 13

57 Supplemental Table 9. Proteins with altered abundance between diagnosis and relapse samples.... 14

58 Supplemental Table 10. GO-analysis of relapse-associated significantly altered proteins..... 14

59 Supplemental Table 11. Spearman correlation analysis between protein and mRNA levels..... 14

60 Supplemental Table 12. Novel peptides derived from proteogenomic analysis of the adult cohort. 14

61 Supplemental Table 13. Novel peptides derived from proteogenomic analysis of the pediatric

62 cohort..... 14

63 Supplemental Table 14. Novel peptides with altered abundance between adult diagnosis and paired

64 relapse samples..... 15

65 Supplemental Table 15. Novel peptides with altered abundance between pediatric diagnosis and

66 paired relapse samples..... 15

67 Supplemental Table 16. Fusion peptides derived from proteogenomic analysis. .... 15

68 Supplemental Table 17. HiRIEF fractions gradient length. .... 15

69 Supplemental Table 18. WGS-based read depth of mitochondrial and nuclear DNA. .... 15

70 SUPPLEMENTAL FIGURES ..... 16

71 Supplemental Figure 1: Unsupervised clustering of adult and pediatric R/PR AML. .... 16

72 Supplemental Figure 2: Proteins with significantly altered levels between paired diagnosis and  
73 relapse samples..... 18

74 Supplemental Figure 3: Higher levels of mitochondria-associated proteins and mitochondrial DNA at  
75 AML relapse..... 19

76 Supplemental Figure 4: Higher levels of mitochondrial DNA at AML relapse..... 21

77 Supplemental Figure 5: The levels of splicing-related proteins differ between AML diagnosis and  
78 relapse..... 22

79 Supplemental Figure 6: Upregulation of granzymes at AML relapse is detected also at the  
80 transcriptomic level ..... 23

81 Supplemental Figure 7: Lower protein and mRNA expression of CR1 at AML relapse. .... 24

82 Supplemental Figure 8. Overview of the proteogenomic workflow ..... 25

83 Supplemental Figure 9: Highly abundant novel peptides in adult R/PR AML. .... 27

84 Supplemental Figure 10: Highly abundant novel peptides in pediatric R/PR AML. .... 29

85 SUPPLEMENTAL REFERENCES ..... 30

86

## 87 **SUPPLEMENTAL METHODS**

### 88 **Cohort information**

89 Acute myeloid leukemia (AML) samples (n=119) were retrieved from Uppsala Biobank or the  
90 Karolinska Institute Biobank, with all of the samples being collected from 1995 through 2016.  
91 The following sample collections part of Uppsala Biobank were utilized: i) Clinical Pathology,  
92 Uppsala University Hospital, Sweden; ii) Nordic Society of Paediatric Haematology and  
93 Oncology ([www.nopho.org](http://www.nopho.org)); and iii) U-CAN(1). Further, a sample collection at Astrid  
94 Lindgren's Children's Hospital, Stockholm, Sweden, that is part of the Karolinska Institute  
95 Biobank, was utilized. All patients included in this study were clinically characterized and  
96 classified following common standards (refs.(2, 3) and NOPHO-DBH AML 2012 Protocol  
97 [EudraCT Number 2012-002934-35]).

98 Event-free survival (EFS) was determined as the time from initial diagnosis until first relapse  
99 or initial treatment failure, with the latter indicated by time = 0. Short EFS was defined as < 6  
100 months for adults and < 12 months for pediatric patients. Primary resistant (PR) cases suffered  
101 treatment failure without reaching first complete remission. Persistent relapse (R-P) samples  
102 were acquired post-relapse treatment from patients not achieving complete remission after  
103 relapse onset.

104 Genomic characterization of the entire study cohort, in the form of whole genome sequencing  
105 (WGS) or whole exome sequencing (WES), was reported previously(4) (data available via  
106 controlled access: [doi.org/10.17044/scilifelab.12292778](https://doi.org/10.17044/scilifelab.12292778)), including bone marrow (BM)  
107 derived normal stromal cells as well as complete remission BM samples as a source of germline  
108 DNA. The analyzed WGS/WES data comprise information about somatic single nucleotide  
109 variants (SNVs), insertions and deletions (InDels), copy number alterations and copy-neutral  
110 loss-of-heterozygosity(4). Further, transcriptomic characterization in the form of transcriptome  
111 sequencing (RNA-seq) was previously reported(5) for all besides one of the samples, including  
112 CD34-expressing BM cells from five healthy donors serving as normal controls (BM-controls;  
113 **Supplemental Table 4**; data available via controlled access:  
114 [doi.org/10.17044/scilifelab.13105229](https://doi.org/10.17044/scilifelab.13105229)). The analyzed RNA-seq data comprise differential gene  
115 expression results and identified gene fusions, SNVs and small InDels (as part of ref.(5)).

116 Detailed clinical and biological characteristics are summarized in **Supplemental Tables 1-3**.

## 117 **Sample processing and in-depth proteomics by using HiRIEF LC-MS**

118 Proteomic analysis was performed by high-resolution isoelectric focusing liquid  
119 chromatography mass spectrometry (HiRIEF LC-MS) on 119 AML samples and five BM-  
120 control samples (**Supplemental Tables 3 and 4**). The sample source composition was as  
121 follows: BM: n=71/119, 59.7%; Peripheral blood (PB): n=26/119, 21.8%; Unknown if BM or  
122 PB: n=19/119, 16.0%; BM and PB sample pooled after processing due to insufficient amount  
123 of lysate if kept separated: n=2/119, 1.7%; Pleural fluid: n=1/119, 0.84% (**Supplemental Table**  
124 **2**).

125 Precipitated protein fractions from the AllPrep DNA/RNA/Protein kit (Qiagen, Hilden,  
126 Germany) were dissolved in 50µl Lysis buffer (4% SDS, 20mM HEPES pH 7.6, 1mM DTT),  
127 heated to 95°C and sonicated. The total protein amount was estimated by using the DC Protein  
128 Assay (Bio-Rad, Hercules, CA, USA). Samples were prepared for MS analysis by using a  
129 modified version of the SP3 protein clean-up and digestion protocol(6, 7), where proteins were  
130 digested by Lys-C and trypsin (sequencing grade modified, Pierce™ Thermo Fisher Scientific,  
131 Waltham, MA, USA). In brief, 71-250µg protein from each sample was reduced by addition of  
132 1mM DTT and alkylated with 2.5mM Iodoacetamide. Sera-Mag SP3 bead mix (10µl) was  
133 added together with acetonitrile (final concentration 50%). The mix was incubated under  
134 rotation at room temperature for eight minutes and placed on a magnetic rack. The supernatant  
135 was discarded, followed by two washes with 70% ethanol and one with 100% acetonitrile. The  
136 beads-protein mixture was reconstituted in 50µl Lys-C buffer (1M Urea, 25mM HEPES pH  
137 7.6) and incubated overnight. Finally, trypsin was added in 1:50 enzyme to protein ratio in 50µl  
138 25mM HEPES pH 7.6 and incubated overnight. The peptides were eluted from the mixture after  
139 placing the mixture on a magnetic rack, followed by peptide concentration measurement (DC  
140 Protein Assay).

141 The samples were thereafter pH adjusted by using TEAB pH 8.5 (100mM final concentration).  
142 Forty µg of peptides from each sample were labelled with isobaric tandem mass tags  
143 (TMT10plex reagent; Thermo Fisher Scientific) according to the manufacturer's protocol and  
144 thereafter separated by immobilized pH gradient - isoelectric focusing (IPG-IEF) on 3–10 strips  
145 as described previously(8). Samples were pooled into sets of ten as detailed in **Supplemental**  
146 **Table 2**. Each set comprised of adult samples included a BM-control sample or a technical  
147 control together with up to eight different tumor samples and a pooled sample (internal  
148 standard; IS). To be able to compare and/or integrate the data derived from the adult and the  
149 pediatric samples, the pooled IS sample of the adult MS-analysis (referred to as IS-Adult) was

150 included also in pediatric set B. Additionally, all other sets comprised of pediatric samples  
151 included a technical control. The labelling efficiency was determined by LC-MS/MS before  
152 pooling of the samples. For the sample clean-up step, a solid phase extraction (SPE strata-X-C,  
153 Phenomenex, Torrance, CA, USA) was performed and purified samples were dried in a  
154 SpeedVac. An aliquot of approximately 10µg was suspended in LC mobile phase A and 1µg  
155 was injected on the LC-MS/MS system.

156 Online LC-MS was performed as previously described(8) by using a Dionex UltiMate™ 3000  
157 RSLCnano System coupled to a Q-Exactive-HF mass spectrometer (Thermo Fisher Scientific).  
158 All samples were dissolved in 20µl solvent A and subsequently 10µl were injected. Samples  
159 were trapped on a C18 guard-desalting column (Acclaim PepMap 100, 75µm x 2 cm,  
160 nanoViper, C18, 5µm, 100Å), and separated on a 50cm long C18 column (Easy spray PepMap  
161 RSLC, C18, 2µm, 100Å, 75µm x 50cm). The nano capillary solvent A was 94.9% water, 5%  
162 DMSO, 0.1% formic acid; and solvent B was 4.9% water, 5% DMSO, 90% acetonitrile, 0.1%  
163 formic acid. At a constant flow of 0.25µl per minute, the curved gradient went from 6-8% B up  
164 to 40% B in each fraction in a dynamic range of gradient length (**Supplemental Table 17**),  
165 followed by a steep increase to 100% B in 5 min. FTMS master scans with 60000 resolution  
166 (and mass range 300-1500m/z) were followed by data-dependent MS/MS (30000 resolution)  
167 on the top five ions by using higher energy collision dissociation at 30% normalized collision  
168 energy. Precursors were isolated with a 2m/z window. Automatic gain control targets were 1e6  
169 for MS1 and 1e5 for MS2. Maximum injection times were 100ms for MS1 and 100ms for MS2.  
170 The entire duty cycle lasted ~2.5s. Dynamic exclusion was used with 30s duration. Precursors  
171 with unassigned charge state or charge state one were excluded. An underfill ratio of 1% was  
172 used.

### 173 **Peptide identification and quantification**

174 Orbitrap raw MS/MS files were converted to mzML format by using msConvert from the  
175 ProteoWizard tool suite(9). Spectra were subsequently searched by using MS-GF+ (release  
176 2017.07.21; ref.(10)) and Percolator (v.3.01.01; ref.(11)), with search results from eight  
177 subsequent fractions being grouped for Percolator target/decoy analysis. For the adult cohort,  
178 searches were done against the human protein subset of Ensembl v.75 in a Galaxy(12)  
179 proteomics workflow (v.2.3; ref.(13)). For the pediatric cohort, searches were done against the  
180 human protein subset of Ensembl v.75 in a Nextflow (v.19.04.0) proteomics workflow. Of  
181 importance is that Galaxy and Nextflow only serve as workflow executors for the softwares

182 utilized in the searches, and the same softwares were contained in both pipelines. In both  
183 workflows, MS-GF+ settings included precursor mass tolerance of 10ppm, fully-tryptic  
184 peptides, maximum peptide length of 50 amino acids and a maximum charge of six. Fixed  
185 modifications were TMT10plex on lysines and peptide N-termini, and carbamidomethylation  
186 on cysteine residues. A variable modification setting was used for oxidation on methionine  
187 residues. Quantification of TMT10plex reporter ions was done by using OpenMS(14) project's  
188 IsobaricAnalyzer. Peptide spectrum matches (PSMs) found at 1% false discovery rate (FDR)  
189 were used to infer gene identities.

190 Protein quantification by TMT10plex reporter ions was calculated by using PSM TMT ratios  
191 to the internal standard and normalized to the sample median. The median PSM TMT reporter  
192 ratio from peptides unique to a gene symbol was used for quantification. Protein FDRs were  
193 calculated by utilizing the picked-FDR(15) method by using gene symbols as protein groups  
194 and limited to 1% FDR.

### 195 **Tumor purity assessment**

196 Next-generation sequencing-based tumor purity assessment was manually performed based on  
197 patient-matched genomic material(4) extracted together with the corresponding proteins  
198 (**Supplemental Table 2**). For samples sequenced by WGS, purity was based on their available  
199 somatic genomic aberrations, and how the relative effect on sequence coverage (deletion from  
200 two to one copy), the allele ratio of heterozygous single nucleotide polymorphisms (in regions  
201 with copy-neutral loss-of-heterozygosity) and somatic SNVs (in diploid regions) would  
202 theoretically scale with tumor purity. The estimated purity for samples sequenced by WES was  
203 based on solely somatic SNVs present in diploid regions. The next-generation sequencing-  
204 based purity results were further compared to information from morphology-based purity  
205 assessment of May Grünwald and Giemsa stained cells post cryopreservation and, if applicable,  
206 post immune-based depletion of non-tumor cells (**Supplemental Table 2**).

### 207 **Protein abundance analysis, and calculation and visualization of statistical significance**

208 Qlucore omics explorer 3.6 was utilized to perform data correction for sex, for generating an  
209 overview of the proteomic landscape, and for analysis of differential protein levels between  
210 diagnosis and relapse samples. The following visualizations and statistical calculations were  
211 performed by using Qlucore omics explorer v.3.6 with default settings, if not otherwise  
212 specified: Principal Component Analysis (PCA; according to ref.(16-18)); t-Distributed  
213 Stochastic Neighbor Embedding (t-SNE; according to ref.(19, 20)); Hierarchical clustering and

214 associated heat maps were constructed following ref.(21), by using log<sub>2</sub>-transformed  
215 normalized values following the Euclidean metric on normalized variables (mean = 0, variance  
216 = 1). Further, genes were ranked according to their R/R<sup>2</sup>-statistic values (R-statistics;  
217 **Supplemental Table 9**), which Qlucore computes according to the coefficient of partial  
218 determination. The Benjamini-Hochberg(22) method was applied to correct for multiple testing  
219 and the fold change (FC) was calculated from the difference between the arithmetic averages  
220 over each group. Volcano plots were used to identify the highest ranked proteins with altered  
221 abundance among sample groups and Venn diagrams were utilized to inspect the intersection  
222 of significantly altered proteins between experiments.

223 GraphPad Prism v.9.1.2 and v.9.2.0 were used to calculate significant differences observed in  
224 protein, mRNA and DNA levels between two or more groups, and results were visualized in  
225 the form of scatter plots with mean and standard deviation (SD), spaghetti plots or bar diagrams.  
226 The Mann-Whitney test was used for two-group comparisons on non-parametric data, whereas  
227 the Kruskal-Wallis test was used for multi-group comparisons on non-parametric data followed  
228 by Dunn's correction for multi-group comparisons. For a patient-matched two-group  
229 comparison on non-parametric data, the Wilcoxon matched-pairs signed rank test was applied  
230 and results were shown in the form of spaghetti plots. For one group comparisons, the non-  
231 parametric one sample Wilcoxon signed rank test with theoretical median = 1.0 or 100, as  
232 appropriate, was used. Correlation between protein levels and mRNA expression values of  
233 matched samples was calculated by using the non-parametric measure of Spearman's rank  
234 correlation coefficient (**Supplemental Table 11**).

### 235 **Gene ontology enrichment analysis**

236 Gene Ontology (GO) enrichment analysis was carried out by using Gene Ontology enRIchment  
237 anaLysis and visualizAtion tool (GORilla(23, 24)). A target list of upregulated proteins was  
238 compared to the background of all detected proteins (adult: n = 6797; pediatric: n = 6926;  
239 **Supplemental Table 6**) by using the standard Hyper Geometric statistics with a P-value  
240 threshold of 0.01. Significant GO-terms with Benjamini-Hochberg adjusted P-values (FDR <  
241 0.01) and a minimum enrichment score of three, were displayed in the form of bar diagrams  
242 (**Supplemental Table 10**).

### 243 **Immunoblotting**

244 Total cell lysates were denatured in NuPAGE™ LDS Sample Buffer (NP0007; Thermo Fisher  
245 Scientific) at 70°C for 10 min. At least 36µg of total lysate per sample were separated via SDS-



246 PAGE (NuPAGE™ 4 to 12%, Bis-Tris gels; NP0323BOX; Thermo Fisher Scientific). Proteins  
247 were transferred to nitrocellulose membranes using iBlot™ transfer stacks (IB301002; Thermo  
248 Fisher), followed by blocking with Phosphate Buffered Saline containing 0.05% (v/v) Tween-  
249 20 and 5% skimmed milk for 1h at room temperature, and overnight incubation at 4°C with  
250 primary antibodies (anti-  $\beta$ -Actin [1:5000 dilution; A5441; Sigma-Aldrich; Target protein size:  
251 42kDa], anti-MTIF3 [1:500; HPA039791; Atlas Antibodies; Target protein size: 32kDa], anti-  
252 NDUFC2 [1:500 dilution; 15573-1-AP; Proteintech; Target protein size: 14kDa];  
253 **Supplemental Table 5**). Incubation with secondary antibodies (Amersham ECL anti-mouse  
254 IgG-HRP conjugate [1:5000 dilution; NA931; Cytiva], Amersham ECL anti-rabbit IgG-HRP  
255 conjugate [1:5000 dilution; NA934; Cytiva]) was carried out at room temperature for 45min.  
256 Pierce™ ECL Western Blotting Substrate (32106; Thermo Fisher) was used for horseradish  
257 peroxidase (HRP)-conjugated secondary antibodies. Images were acquired and analyzed using  
258 an Amersham™ Imager 680 (GE Healthcare). Densitometry analysis of protein levels was  
259 performed using the Amersham™ Imager 680 associated software, and the values were  
260 normalized to the respective  $\beta$ -Actin loading control.

#### 261 **Assessment of mitochondrial DNA levels**

262 For investigation of the relative frequency of mitochondrial DNA (mtDNA) per AML sample,  
263 all cases with available patient-matched diagnosis- and relapse WGS data(4) (**Supplemental**  
264 **Table 8C-D**) were examined with regards to read depth of mtDNA and nuclear DNA, the latter  
265 as assessed via the mean read depth of the entire nuclear genome, as well as of the two  
266 mitochondria-associated genes *MTIF3* and *NDUFC2*, which are located in the nuclear genome.  
267 The mitochondrial and genomic read depth for the respective samples are presented in  
268 **Supplemental Table 18**. By dividing [mtDNA read depth] with [mean nuclear genome read  
269 depth], the sample-specific and normalized ratio of the amount of mtDNA versus nuclear DNA  
270 was achieved for each sample. Thereafter, a case-specific ratio was generated by dividing the  
271 [relapse normalized ratio] with the [diagnosis normalized ratio] for each case, rendering  
272 information on alterations in the mtDNA amount over time for each case.

#### 273 **Proteogenomic identification of novel peptides and single amino acid alterations**

274 Transcripts were assembled from the RNA-seq data(5) of each sample by using StringTie  
275 (v.2.1; ref.(25)) based on the human reference gene annotations (Ensembl v.75). Next,  
276 transcripts with low expression level (transcript per million < 1) were removed and the  
277 remaining transcripts were three-frame translated into protein sequences by using the

278 Biopython (v1.72; ref.(26)) package. Additionally, a curated list of somatic mutations identified  
279 from patient-matched WGS/WES derived data(4) was used to generate mutated peptide  
280 sequences (SAAAs). Each mutation was extended by 50bp at both sides and the obtained DNA  
281 sequence from GRCh37 was used as the reference DNA. The corresponding positions in the  
282 reference sequence were altered to obtain a mutated sequence. Next, each of the reference and  
283 the altered sequences were six-frame translated.

284 The protein sequences from the transcripts and mutations were combined and digested into  
285 tryptic peptides. Tryptic peptides with a minimum length of eight amino acids and a maximum  
286 length of 40 amino acids were retained. The database was fractionated based on the peptide  
287 isoelectric points as further detailed by Branca *et al.*(8). Finally, the human canonical proteins  
288 (Ensembl v.75) were appended to the peptide database.

289 The proteomics data from each cohort were searched against the peptide database from the same  
290 cohort by using MS-GF+ (v.2020.01.15; ref.(10)). Percolator (v.3.04.0 ref.(11)) was used for  
291 Percolator target-decoy scoring. Peptides at FDR < 0.01 were considered significant, while  
292 those matching canonical protein sequences were removed. By using blast, the remaining  
293 peptides were searched against a larger collection of reference protein databases that included  
294 Uniprot (as of December 11, 2019); ref.(27), Gencode v.33 ref.(28), Ensembl v.99 ref.(29), and  
295 RefSeq (as of May 29, 2020). Peptides matching sequences from the collection of reference  
296 protein databases were removed and those with one mismatch were further validated by using  
297 SpectrumAI(30). Finally, the list of novel peptides contained peptides with more than one  
298 mismatch or no match to known proteins, as well as those peptides that passed SpectrumAI  
299 validation (**Supplemental Tables 12 and 13**).

### 300 **Detection of fusion peptides**

301 A list of curated gene fusions identified by RNA-seq were translated into protein sequences by  
302 three-frame translation. For FDR calculation purposes, the protein sequences were reversed to  
303 obtain a decoy set of sequences. The two protein sets (fusion-translations and their decoys)  
304 were appended to the human canonical protein sequences (Ensembl v.75). Fusion peptides that  
305 did not match any canonical proteins were considered as novel peptides.

### 306 **Identification of samples expressing the respective novel peptide**

307 To identify the sample(s) in which the respective novel peptide was the most abundant, the  
308 TMT ratio for all channels across the TMT sets for each novel peptide sequence per cohort was

309 obtained. In order to normalize the values across the sets, the mean ratio was calculated by  
310 dividing the sum of all channels by the number of channels excluding the reference channel as  
311 well as channels with *NA* values. Next, a threshold was defined as the third quantile multiplied  
312 by two in order to detect samples with high expression levels. Finally, only samples that had a  
313 normalized expression larger than the defined threshold were considered to have the respective  
314 peptide highly expressed. Results were visualized in the form of box plots showing the  
315 normalized expression level per peptide sequence across all samples where the peptide was  
316 detected (**Supplemental Figures 8 and 9**).

### 317 **Manual curation of identified novel peptides**

318 The output of the proteogenomic search was further manually curated. Here, variants annotated  
319 as “exon\_variant”, “five\_prime\_utr\_extension”, “intron\_retention” or “other” with a  
320 simultaneous annotation as “canonical” with regards to reading frame, were manually  
321 investigate by using the UCSC genome browser(31). Through this process, ten variants  
322 identified in adults and three variants identified in children were excluded, since they were  
323 identical to an already reported unverified isoform ( $n = 11$ ), or to the expected resulting peptide  
324 based on a known common single nucleotide polymorphism ( $n = 2$ ).

### 325 **Code availability**

326 Custom codes are available from the authors upon request.

### 327 **Sample usage for various analyses**

328 Detailed information regarding samples included in the comparison between diagnosis and  
329 paired relapse samples, as well as those part of the proteogenomic analyses, is present in  
330 **Supplemental Table 8**.

331

## 332 SUPPLEMENTAL TABLE LEGENDS

333 **Supplemental Tables 1-18** are present in a separate Supplemental document, including a  
334 content list, abbreviations and a legend regarding color coding on the first sheet of that  
335 document.

336 **Supplemental Table 1: Clinical information.** Clinical characteristics of the patients included  
337 in the R/PR AML study cohort are summarized. Allo, allogeneic; Auto, autologous; CR,  
338 complete remission; D, diagnosis; F, female; HSCT, hematopoietic stem cell transplantation;  
339 M, male; M0-M7, the French-American-British (FAB) classification of AML; MDS,  
340 myelodysplastic syndromes; NOS, not otherwise specified; PR, primary resistant; R1/2/3,  
341 sequential relapses; t-AML, treatment related AML; WBC, white blood cell count; VP, current  
342 treatment protocol.

343 **Supplemental Table 2: Study cohort sample characteristics.** Detailed information regarding  
344 the characteristics of the 119 tumor samples and five BM-control samples included in the  
345 current study. Sample purity and cell viability are given in intervals of 10 and 25%, respectively.  
346 Included are also the HiRIEF LC-MS set composition and information about technical controls.  
347 Allo, allogeneic; BM, bone marrow; BM-controls, CD34-expressing BM cells from healthy  
348 donors; D, diagnosis; HSCT, hematopoietic stem cell transplantation; HiRIEF LC-MS, high  
349 resolution isoelectric focusing liquid chromatography mass spectrometry; NOPHO, Nordic  
350 Society of Paediatric Haematology and Oncology; PB, peripheral blood; PR, primary resistant;  
351 R1/2/3, sequential relapses; R1/2-P, persistent relapse specimen; RNA-seq, transcriptome  
352 sequencing; U-CAN, Uppsala Umeå Comprehensive Cancer Consortium, Sweden; WES,  
353 whole exome sequencing; WGS, whole genome sequencing.

354 **Supplemental Table 3. Study cohort samples and applied analysis methods.** Summary of  
355 the AML samples included in the study cohort, as well as overlapping genomic and  
356 transcriptomic analysis methods performed for the respective samples. BMS, bone marrow  
357 derived stromal cells; CR, complete remission; D, diagnosis; G, genomic (WGS/WES) data  
358 available; PR, primary resistant; R1/2/3, sequential relapses; R1/2-P, persistent relapse  
359 specimen; P, proteomic data available; T, transcriptomic (RNA-seq) data available; WES,  
360 whole exome sequencing; WGS-30X, whole genome sequencing, aiming at > 30X coverage;  
361 WGS-90X, whole genome sequencing, aiming at > 90X coverage.

362 **Supplemental Table 4: BM-control sample characteristics.** Summary of the characteristics  
363 of the five individual healthy donors and associated samples (CD34-expressing bone marrow  
364 cells; ABM017F; AllCells Inc) included in the study cohort.

365 **Supplemental Table 5: Antibody information.** Antibodies used for purification of patient-  
366 derived AML samples by immune-based depletion of non-tumor cells, as well as for  
367 immunoblotting.

368 **Supplemental Table 6. Expressed proteins and annotated genes in adult and pediatric**  
369 **R/PR AML.** Quantified proteins detected in all adult and/or pediatric AML samples alongside  
370 with their corresponding gene annotation are listed. The list of proteins was utilized for  
371 differential protein expression analyses and as background list for the gene ontology and  
372 enrichment investigations.

373 **Supplemental Table 7. Comprised metadata and multi-omics results overlay.** Various  
374 sample- and clinical information, combined with data regarding variants recurrently identified  
375 in the R/PR cohort, on a per sample basis. Next-generation sequencing data are based on WGS,  
376 WES and RNA-seq results reported previously(4, 5). Information in regards to sample usage  
377 for various analyses is included for each sample. CNA, copy number alteration; CN-LOH,  
378 copy-neutral loss-of-heterozygosity; D, diagnosis; F, female; FAB, the French-American-  
379 British classification of AML; InDel, insertion or deletion mutation; M, male; MS, mass  
380 spectrometry; PR, primary resistant; R1/2/3, sequential relapses; R-P, persistent relapse  
381 specimen; RNA-seq, transcriptome sequencing; WES, whole exome sequencing; WGS-30X,  
382 whole genome sequencing, aiming at > 30X coverage; WGS-90X, whole genome sequencing,  
383 aiming at > 90X coverage.

384 **Supplemental Table 8. Sample usage for various analyses.** Tumor samples included for  
385 various analyses. **A-B)** Protein abundance analyses between samples associated with relapse  
386 versus paired pre-treatment diagnosis, of (A) adult and (B) pediatric R/PR AML samples. **C-**  
387 **D)** Samples used for the assessment of sample-specific mitochondrial DNA abundance based  
388 on patient-matched diagnosis and relapse samples with available WGS-data for adults (C) and  
389 children (D). **E-F)** Samples used for the proteogenomic analyses, separated into (E) adult and  
390 (F) pediatric samples. BM-controls, CD34-expressing bone marrow cells from healthy donors;  
391 D, diagnosis; PR, primary resistant; R1/2/3, sequential relapses; R-P, persistent relapse  
392 specimen; WGS, whole genome sequencing.

393 **Supplemental Table 9. Proteins with altered abundance between diagnosis and relapse**  
394 **samples.** Summarized are all proteins with altered abundance and the corresponding annotated  
395 genes between diagnosis and relapse samples with a P-value < 0.05. FC > 1.0 indicates higher  
396 protein levels at relapse compared to diagnosis, meanwhile FC < 1.0 indicates lower protein  
397 levels. Only patient-matched diagnosis and relapse samples were included in the comparison  
398 (adult: n = 22 diagnosis-relapse pairs; pediatric: n = 16 diagnosis-relapse pairs). **Supplemental**  
399 **Table 8A-B** presents details regarding samples included for generating the results presented in  
400 this table. FC, fold change; FDR, false discovery rate; R-statistic, square roots of the R2-  
401 statistics (coefficient of determination).

402 **Supplemental Table 10. GO-analysis of relapse-associated significantly altered proteins.**  
403 Detailed results of the GO enrichment analysis, by utilizing GOrilla, for relapse versus paired  
404 diagnosis samples. Proteins with altered abundance with a P-value < 0.05 and a FC > 1 were  
405 analyzed against the background of all expressed proteins found in all adult, respectively,  
406 pediatric samples (**Supplemental Table 6**). B, total number of genes associated with a specific  
407 GO term; b, number of genes in the intersection; FC, fold change; FDR, false discovery rate  
408 (Benjamini–Hochberg adjusted P-values); GO, gene ontology; N, total number of protein-  
409 coding genes (background list); n, number of genes in the target set.

410 **Supplemental Table 11. Spearman correlation analysis between protein and mRNA levels.**  
411 Correlation analysis-associated statistics between protein levels and mRNA-expression values  
412 for GZMA, GZMB, GZMH, GZMM, CR1, HNRNPA3, KHSRP, NUDT21, SNRPG, and  
413 SRSF9.

414 **Supplemental Table 12. Novel peptides derived from proteogenomic analysis of the adult**  
415 **cohort.** Listed are all novel peptides derived from the proteogenomic analysis after filtration  
416 against UniProt, Ensembl, GENCODE and RefSeq. **Supplemental Table 8E** presents details  
417 regarding AML samples included for generating the results presented in this table. “Also  
418 identified in data from Aasebø *et al.*“ refers to ref.(32). D, diagnosis; PR, primary resistant;  
419 PSM, peptide spectrum match; R1/2/3, sequential relapses.

420 **Supplemental Table 13. Novel peptides derived from proteogenomic analysis of the**  
421 **pediatric cohort.** Listed are all novel peptides derived from the proteogenomic analysis after  
422 filtration against UniProt, Ensembl, GENCODE and RefSeq. **Supplemental Table 8F** presents  
423 details regarding AML samples included for generating the results presented in this table. “Also

424 identified in data from Aasebø *et al.*“ refers to ref.(32). D, diagnosis; PR, primary resistant;  
425 PSM, peptide spectrum match; R1/2/3, sequential relapses; R1/2-P, persistent relapse specimen.

426 **Supplemental Table 14. Novel peptides with altered abundance between adult diagnosis**  
427 **and paired relapse samples.** Listed are all novel peptides derived from the proteogenomic  
428 analysis on adult AML, with different abundance levels between paired diagnosis and relapse  
429 samples, based on limma. A log fold change (logFC) above zero indicates increased peptide  
430 abundance at relapse relative to diagnosis. **Supplemental Table 8A** presents details regarding  
431 AML samples included for generating the results presented in this table. “Also identified in data  
432 from Aasebø *et al.*“ refers to ref.(32). IG, immunoglobulin; PSM, peptide spectrum match;  
433 SAAA, single amino acid alteration.

434 **Supplemental Table 15. Novel peptides with altered abundance between pediatric**  
435 **diagnosis and paired relapse samples.** Listed are all novel peptides derived from the  
436 proteogenomic analysis on pediatric AML, with different abundance levels between paired  
437 diagnosis and relapse samples, based on limma. A log fold change (logFC) above zero indicates  
438 increased peptide abundance at relapse relative to diagnosis. **Supplemental Table 8B** presents  
439 details regarding AML samples included for generating the results presented in this table. “Also  
440 identified in data from Aasebø *et al.*“ refers to ref.(32). IG, immunoglobulin; PSM, peptide  
441 spectrum match; SAAA, single amino acid alteration.

442 **Supplemental Table 16. Fusion peptides derived from proteogenomic analysis.** Listed are  
443 all fusion peptides derived from the proteogenomic analysis by using customized databases  
444 generated from RNA-seq-derived fusion transcripts. D, diagnosis; PR, primary resistant; PSM,  
445 peptide spectrum match; R1/2/3, sequential relapses; R1/2-P, persistent relapse specimen.

446 **Supplemental Table 17. HiRIEF fractions gradient length.** Given are detailed information  
447 about sample fractions and corresponding gradient length.

448 **Supplemental Table 18. WGS-based read depth of mitochondrial and nuclear DNA.** Given  
449 is the read depth of mitochondrial and nuclear DNA based on previously published WGS  
450 data(4) for the indicated samples. Nuclear DNA read depth is given both as a mean of the entire  
451 nuclear genome, as well as for the two mitochondria-associated genes *MTIF3* and *NDUFC2*,  
452 which are located in the nuclear genome. D, diagnosis; R1/2/3, sequential relapses; R1/2-P,  
453 persistent relapse specimen; WGS, whole genome sequencing.

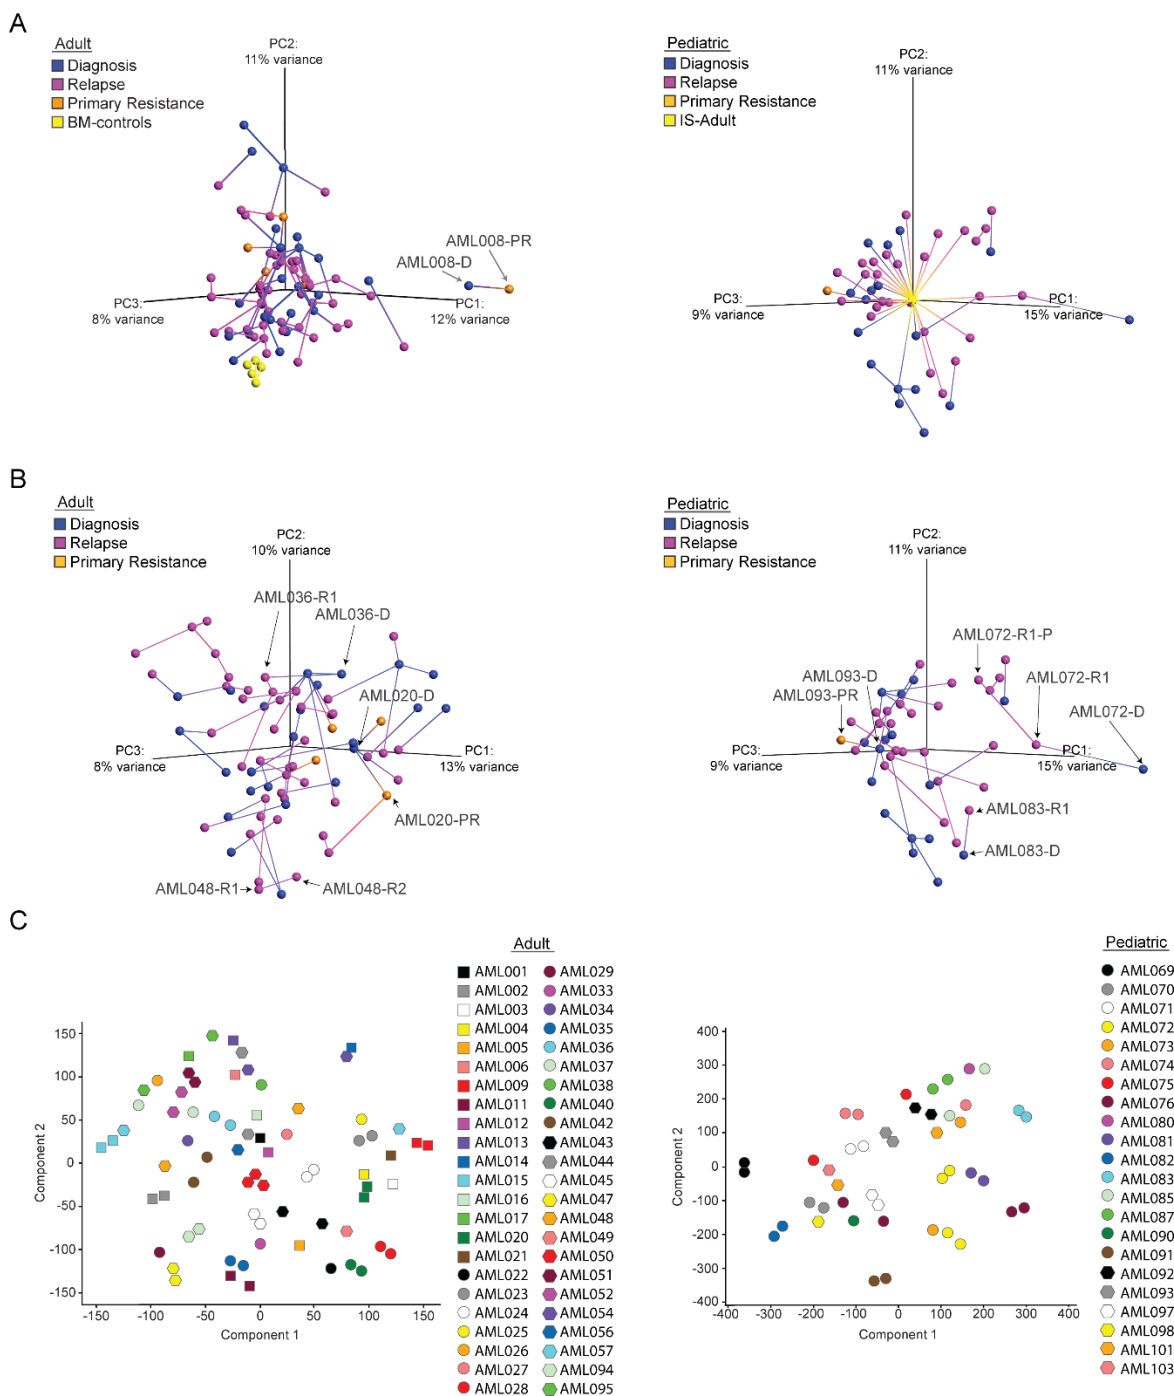

455  
 456 **Supplemental Figure 1: Unsupervised clustering of adult and pediatric R/PR AML. A-B)**  
 457 Principal component analysis (PCA) of tumor and BM-control proteomics data. **A)** PCA with  
 458 all samples part of the (left) adult R/PR AML cohort including the BM-control samples, and  
 459 (right) the pediatric cohort including the internal standard (IS-Adult). **B)** PCA plot for (left)  
 460 adult AML samples represented by 6797 proteins, post exclusion of the outlier AML008-D/PR  
 461 and the BM-control samples, as well as (right) pediatric samples post removal of the internal



462 standard pool (IS-Adult), represented by 6926 proteins. C) Neighboring information in the form  
463 of T-distributed stochastic neighbor embedding (t-SNE) plots showing similarity between  
464 sequential patient-matched tumor samples in adults (left; perplexity = 7) and children (right;  
465 perplexity = 5). Visualization and underlying calculations were performed by using Qluore  
466 omics explorer v.3.6. BM-controls, CD34-expressing bone marrow cells from healthy donors;  
467 IS-Adult, internal standard formed by a pool of all adult AML samples that all pediatric samples  
468 were normalized against, and thus used as an internal control.

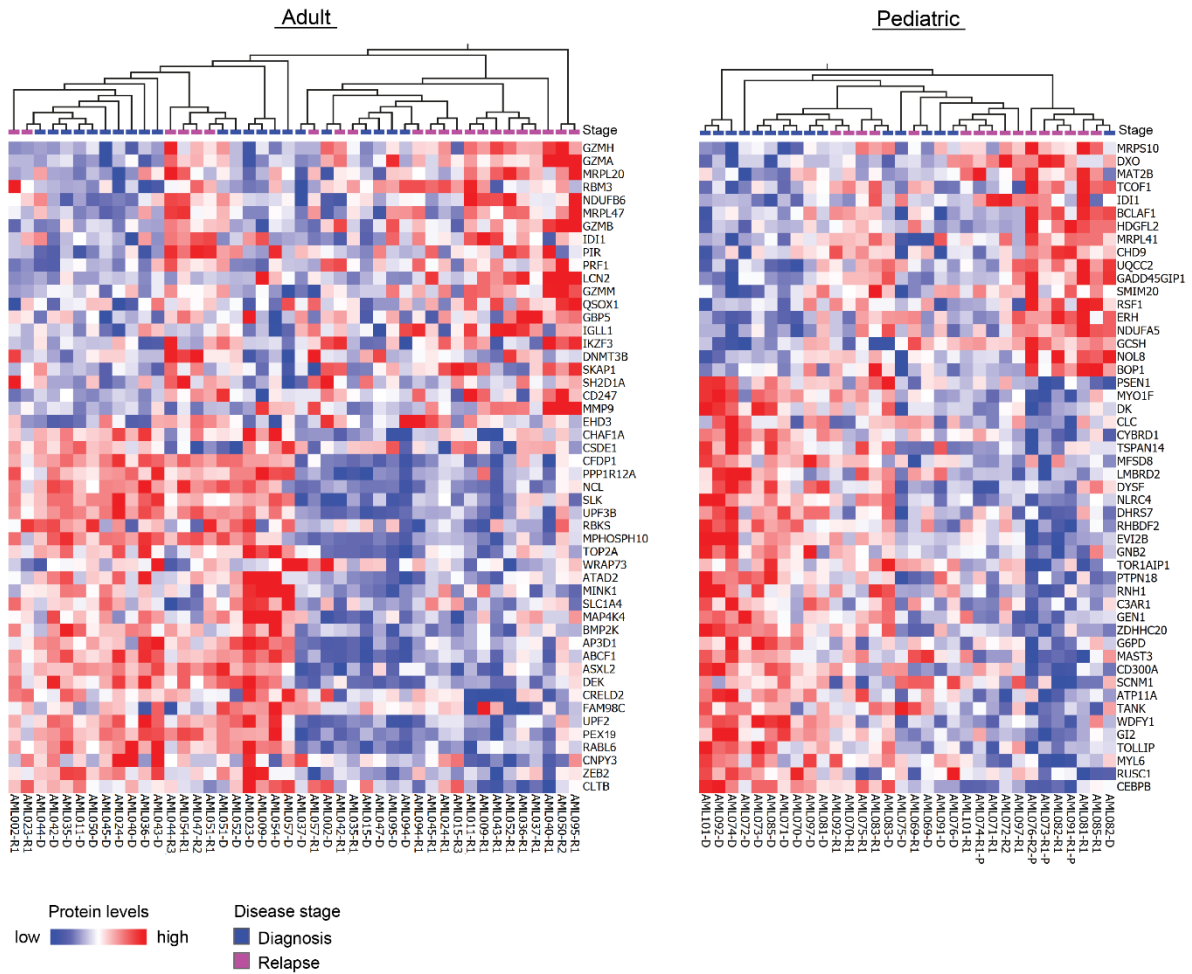

469

470 **Supplemental Figure 2: Proteins with significantly altered levels between paired diagnosis**  
 471 **and relapse samples.** Heat maps and hierarchical cluster analysis of the top 50 ranked  
 472 significantly altered proteins between paired diagnosis and relapse samples for adult (left) and  
 473 pediatric (right) cases (X-axis). Proteins are ranked according to their R-statistic values (Y-  
 474 axis), with higher protein levels at relapse depicted in red and lower protein levels in blue. Gene  
 475 annotation information is given at the right side of each heat map. Visualization and underlying  
 476 statistical calculations were performed by using Qlucore omics explorer v.3.6. **Supplemental**  
 477 **Table 8A-B** presents details regarding samples included for generating the results presented in  
 478 this figure, and **Supplemental Table 9** presents a detailed list including all significantly altered  
 479 proteins ( $P < 0.05$ ). D, diagnosis; R1/2/3, relapse 1/2/3; R1/2-P, persistent relapse.

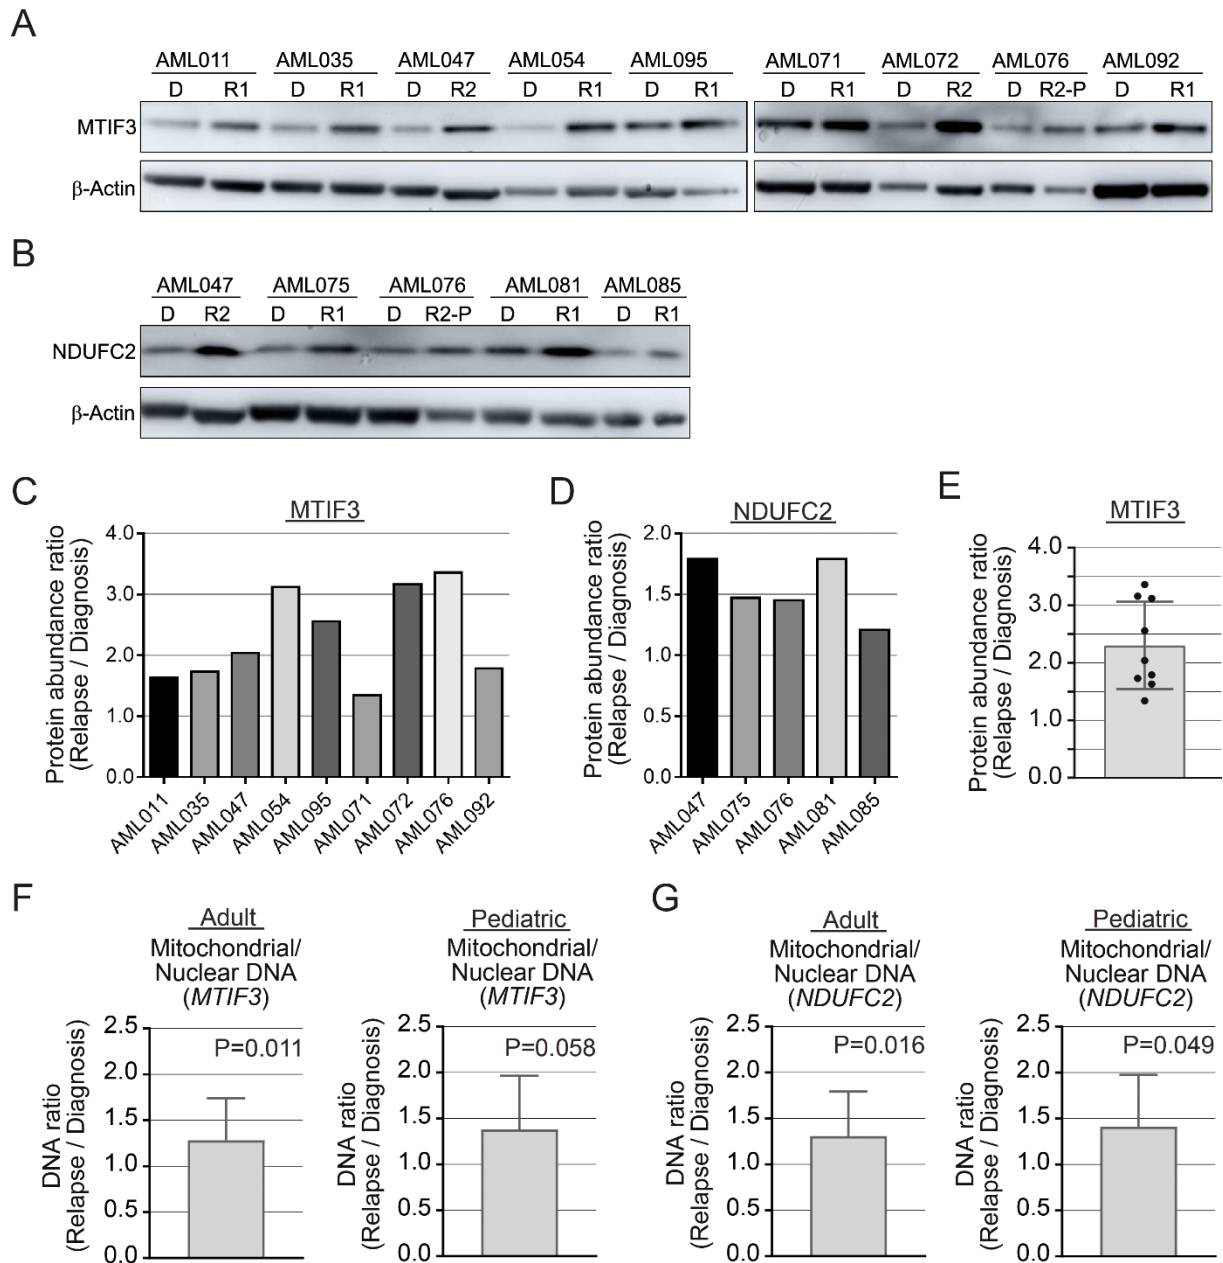

480

481 **Supplemental Figure 3: Higher levels of mitochondria-associated proteins and**  
 482 **mitochondrial DNA at AML relapse. A-B)** Immunoblot analysis of the mitochondria-  
 483 associated proteins MTIF3 (A; antibody HPA039791; Atlas Antibodies) and NDUFC2 (B;  
 484 antibody 15573-1-AP; Proteintech) on total cell lysates ( $\geq 36\mu\text{g}$ ) from patient-matched  
 485 diagnosis and relapse samples from representative AML cases as indicated in the figure.  $\beta$ -  
 486 Actin (antibody A5441; Sigma-Aldrich) was used as loading control. **C-D)** Bar diagrams  
 487 showing the MTIF3 (C) and NDUFC2 (D) protein abundance ratio (relapse / diagnosis) based  
 488 on densitometry analysis of the immunoblots in (A) and (B), respectively, followed by  
 489 normalization to the respective  $\beta$ -Actin loading control. **E)** Bar diagram presenting the mean

490 protein abundance ratio (relapse / diagnosis) based on densitometry analysis of immunoblots of  
491 MTIF3, after normalization to the  $\beta$ -Actin loading control. Original immunoblots and case-  
492 based protein abundance ratios are presented in (A). **F-G**) Bar diagrams (Left, Adults; Right,  
493 Children) presenting the mean ratio of the mitochondrial DNA read depth over the read depth  
494 of the mitochondria-associated genes *MTIF3* (F) and *NDUFC2* (G), which are located in the  
495 nuclear genome, as presented by the ratio at relapse divided by the ratio at diagnosis. The  
496 applied statistical test was Non-parametric One sample Wilcoxon signed rank test with  
497 theoretical median = 1.0. **Supplemental Table 8C-D** presents details regarding samples  
498 included for generating the results presented in (F-G). D, diagnosis; R1/2, relapse 1/2; R2-P,  
499 persistent relapse 2.

A

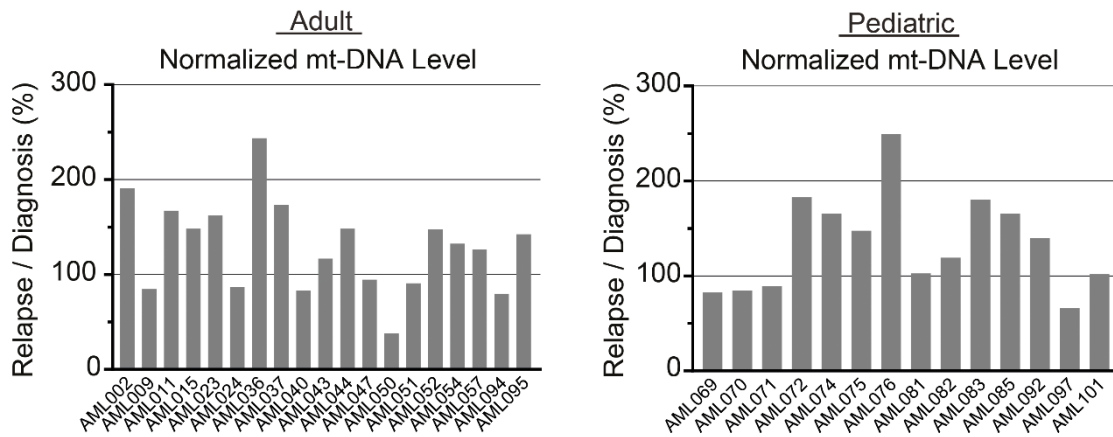

B

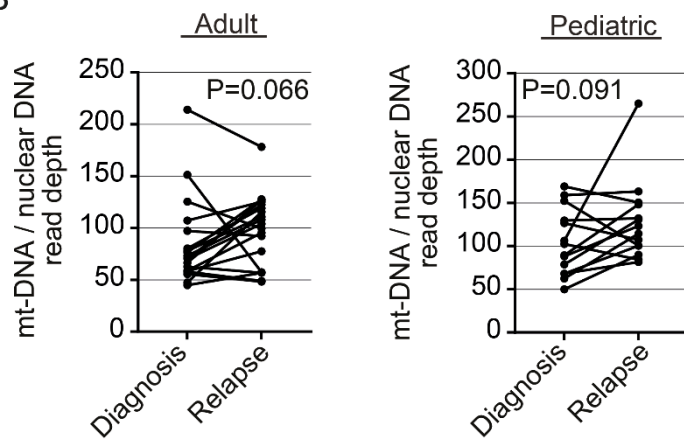

500 **Supplemental Figure 4: Higher levels of mitochondrial DNA at AML relapse.** A) Bar  
 501 diagrams presenting the ratio of mitochondrial DNA read depth over the mean read depth of  
 502 the nuclear genome, as presented by the ratio at relapse divided by the ratio at diagnosis on a  
 503 per sample basis. B) Spaghetti plots showing the mitochondrial DNA amount per sample after  
 504 normalization towards the mean read depth of the nuclear genome, for adults (left) and children  
 505 (right). The applied statistical test was Wilcoxon matched-pairs signed rank test. **Supplemental**  
 506 **Table 8C-D** presents details regarding samples included for generating the results presented in  
 507 this figure. mt, mitochondrial.

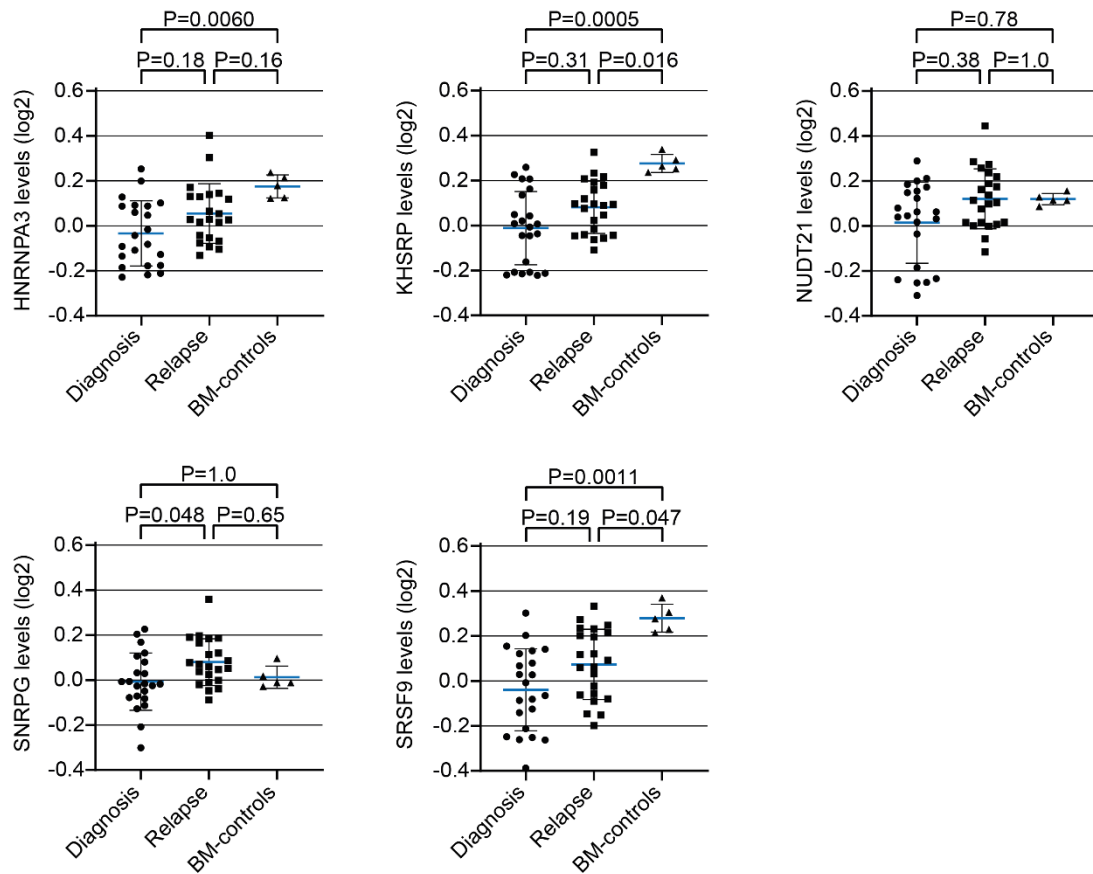

508

509 **Supplemental Figure 5: The levels of splicing-related proteins differ between AML**  
 510 **diagnosis and relapse.** Scatter plots with mean (blue) and SD presenting the protein levels  
 511 (log<sub>2</sub>-transformed) in adult AML samples for the five splicing-related proteins HNRNPA3,  
 512 KHSRP, NUDT21, SNRPG and SRSF9 for diagnosis, relapse and BM-control samples.  
 513 Applied statistical test: Kruskal-Wallis test followed by Dunn's correction for multi-group  
 514 comparisons. Visualization and underlying statistical calculations were performed by using  
 515 GraphPad v.9.1.2. **Supplemental Table 8A** presents details regarding AML samples included  
 516 for generating the results presented in this figure. BM-controls, CD34-expressing bone marrow  
 517 samples from healthy individuals; SD, standard deviation.

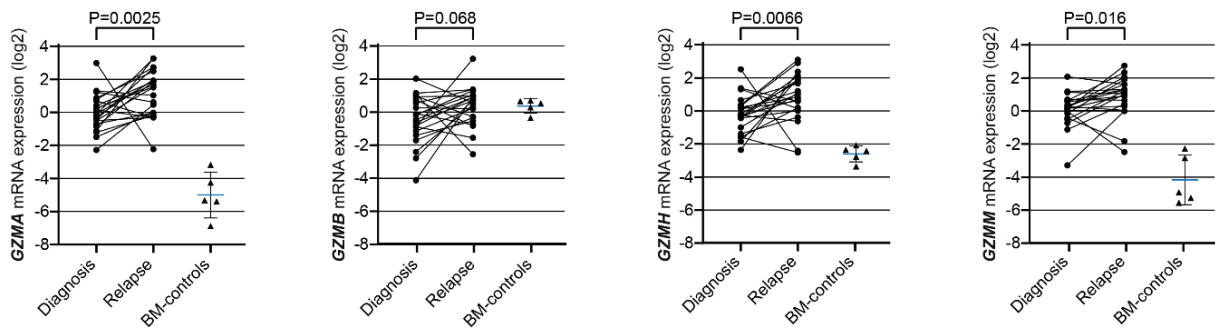

518 **Supplemental Figure 6: Upregulation of granzymes at AML relapse is detected also at the**  
 519 **transcriptomic level.** Spaghetti plots presenting the RNA (TMM normalized and log2-  
 520 transformed(5)) expression values in adult AML samples for the four granzymes *GZMA*,  
 521 *GZMB*, *GZMH* and *GZMM*. Applied statistical test: Wilcoxon matched-pairs signed rank test.  
 522 Each graph is overlaid with a scatter plot with mean (blue) and SD, depicting RNA expression  
 523 values for the BM-controls. Visualization and underlying statistical calculations were  
 524 performed by using GraphPad v.9.1.2. **Supplemental Table 8A** presents details regarding  
 525 samples included for generating the results presented in this figure. BM-controls, CD34-  
 526 expressing bone marrow samples from healthy individuals; SD, standard deviation; TMM,  
 527 trimmed mean of M-values.

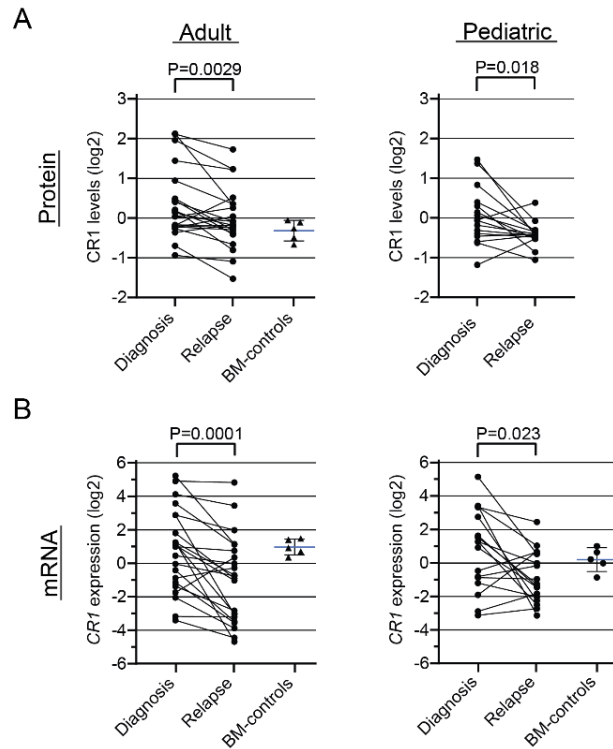

528

529 **Supplemental Figure 7: Lower protein and mRNA expression of CR1 at AML relapse. A)**  
 530 Protein (log<sub>2</sub> transformed) and **B)** RNA (TMM normalized and log<sub>2</sub> transformed(5))  
 531 expression levels of CR1 in patient-matched diagnosis and relapse samples are presented in the  
 532 form of spaghetti plots. Applied statistical test: Wilcoxon matched-pairs signed rank test. Each  
 533 graph is overlaid with a scatter plot with mean (blue) and SD, depicting expression values for  
 534 the BM-controls. No corresponding BM-control pediatric proteome data was available.  
 535 Visualization and underlying statistical calculations were performed by using GraphPad  
 536 v.9.2.0. **Supplemental Table 8A-B** presents details regarding AML samples included for  
 537 generating the results presented in this figure. BM-controls, CD34-expressing bone marrow  
 538 samples from healthy individuals; SD, standard deviation; TMM, trimmed mean of M-values.



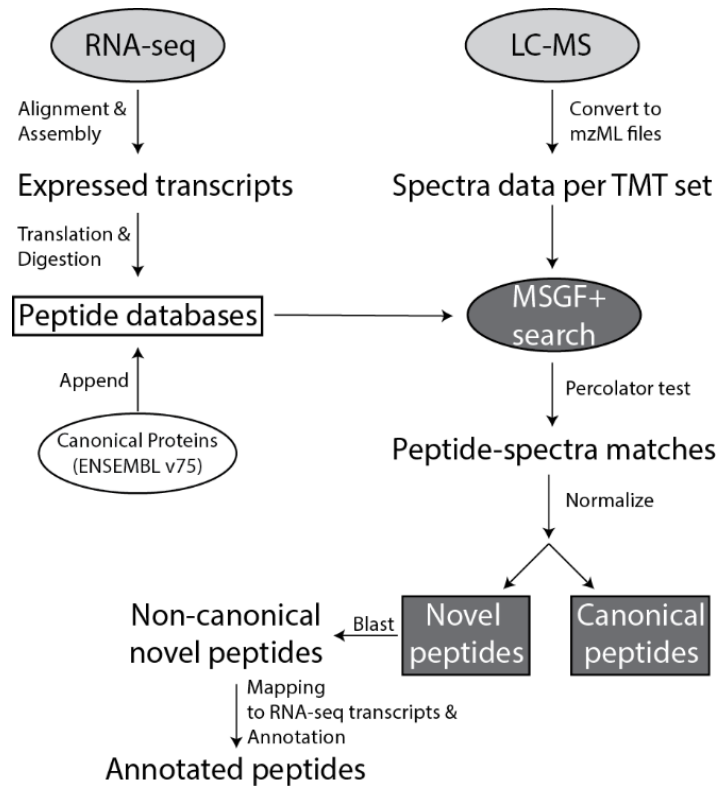

539

540 **Supplemental Figure 8. Overview of the proteogenomic workflow.** RNA-seq data were  
 541 generated through ref.(5). A detailed description of the steps included in the proteogenomic  
 542 workflow are given in the following sub-sections in the Supplemental Methods: “Sample  
 543 processing and in-depth proteomics by using HiRIEF LC-MS”, “Peptide identification and  
 544 quantification” and “Proteogenomic identification of novel peptides and single amino acid  
 545 alterations”. LC-MS, Liquid chromatography mass spectrometry; RNA-seq, transcriptome  
 546 sequencing; TMT, tandem mass tags.

Peptides (adult)

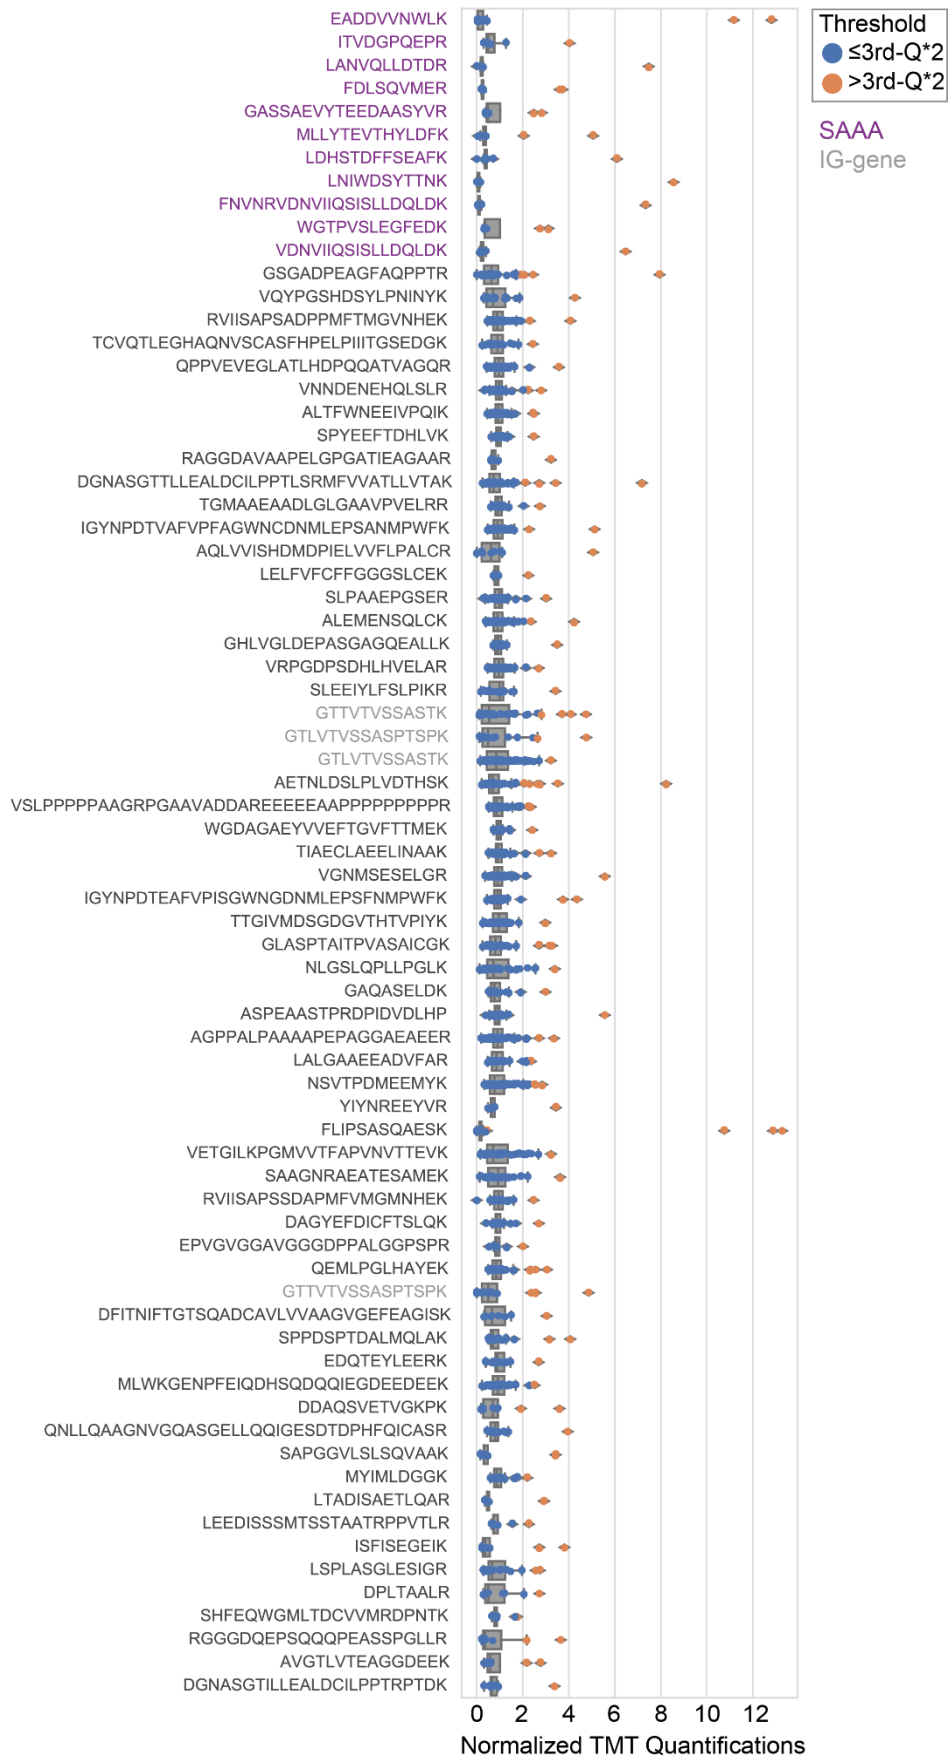

548 **Supplemental Figure 9: Highly abundant novel peptides in adult R/PR AML.** Box plots  
549 showing the normalized quantification level per novel peptide sequence across all adult samples  
550 (including BM-controls) where the peptide is detected. Orange dots denote samples that pass  
551 the outlier threshold (third-quantile\*2). Peptides derived from single amino acid alterations  
552 (SAAAs) are highlighted in purple. Peptides annotated to immunoglobulin genes (IG-genes)  
553 are marked in light gray. **Supplemental Table 8E** presents details regarding samples included  
554 for generating the results presented in this figure and **Supplemental Table 12** presents a  
555 detailed list including all novel peptides. Q, quantile; R/PR AML, relapse and primary resistant  
556 acute myeloid leukemia; TMT, tandem mass tags.

Peptides (pediatric)

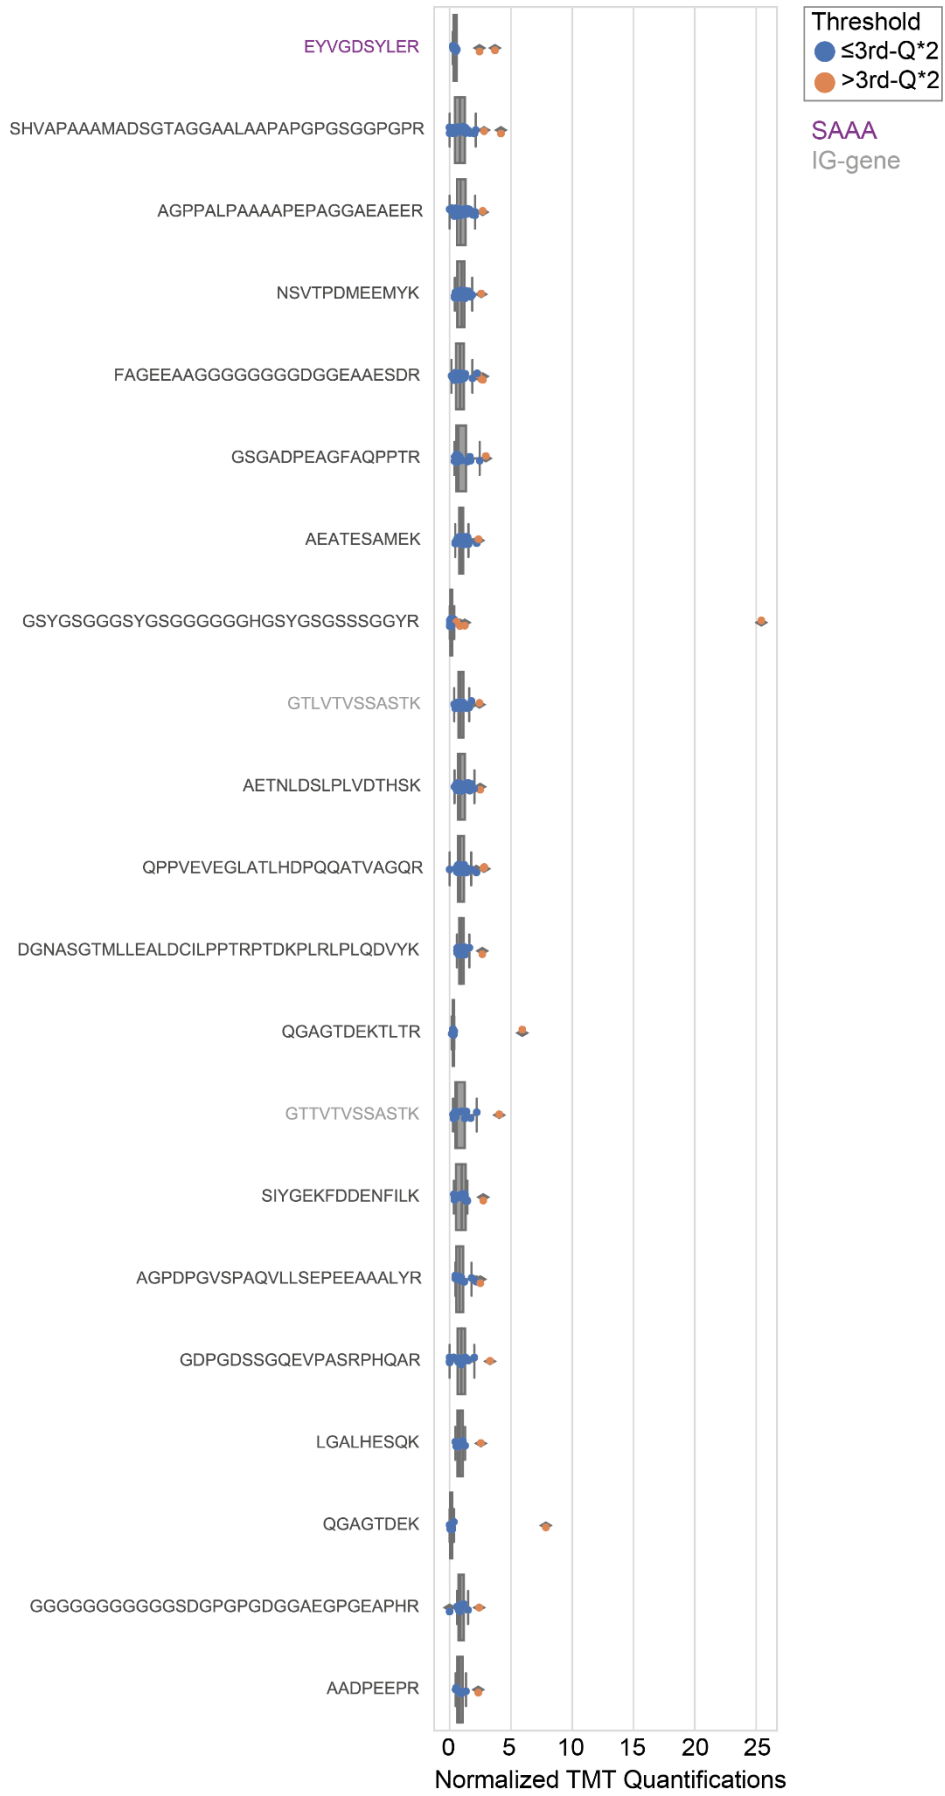

558 **Supplemental Figure 10: Highly abundant novel peptides in pediatric R/PR AML.** Box  
559 plots showing the normalized quantification level per novel peptide sequence across all  
560 pediatric samples where the peptide is detected. Orange dots denote samples that pass the outlier  
561 threshold (third-quantile\*2). A peptide derived from a single amino acid alteration (SAAA) is  
562 highlighted in purple. Peptides annotated to immunoglobulin genes (IG-genes) are marked in  
563 light gray. **Supplemental Table 8F** presents details regarding samples included for generating  
564 the results presented in this figure and **Supplemental Table 13** presents a detailed list including  
565 all novel peptides. Q, quantile, R/PR AML, relapse and primary resistant acute myeloid  
566 leukemia; TMT tandem mass tags.

567 **SUPPLEMENTAL REFERENCES**

- 568 1. Glimelius B, Melin B, Enblad G, Alafuzoff I, Beskow A, Ahlstrom H, et al. U-  
569 CAN: a prospective longitudinal collection of biomaterials and clinical information from adult  
570 cancer patients in Sweden. *Acta Oncol.* 2018;57(2):187-94.
- 571 2. Arber DA, Orazi A, Hasserjian R, Thiele J, Borowitz MJ, Le Beau MM, et al.  
572 The 2016 revision to the World Health Organization classification of myeloid neoplasms and  
573 acute leukemia. *Blood.* 2016;127(20):2391-405.
- 574 3. Dohner H, Estey E, Grimwade D, Amadori S, Appelbaum FR, Buchner T, et al.  
575 Diagnosis and management of AML in adults: 2017 ELN recommendations from an  
576 international expert panel. *Blood.* 2017;129(4):424-47.
- 577 4. Stratmann S, Yones SA, Mayrhofer M, Norgren N, Skaftason A, Sun J, et al.  
578 Genomic characterization of relapsed acute myeloid leukemia reveals novel putative  
579 therapeutic targets. *Blood Adv.* 2021;5(3):900-12.
- 580 5. Stratmann S, Yones SA, Garbulowski M, Sun J, Skaftason A, Mayrhofer M, et  
581 al. Transcriptomic analysis reveals proinflammatory signatures associated with acute myeloid  
582 leukemia progression. *Blood Adv.* 2022;6(1):152-64.
- 583 6. Moggridge S, Sorensen PH, Morin GB, Hughes CS. Extending the  
584 Compatibility of the SP3 Paramagnetic Bead Processing Approach for Proteomics. *Journal of*  
585 *Proteome Research.* 2018;17(4):1730-40.
- 586 7. Hughes CS, Foehr S, Garfield DA, Furlong EE, Steinmetz LM, Krijgsveld J.  
587 Ultrasensitive proteome analysis using paramagnetic bead technology. *Molecular systems*  
588 *biology.* 2014;10(10):757.
- 589 8. Branca RM, Orre LM, Johansson HJ, Granholm V, Huss M, Perez-Bercoff A, et  
590 al. HiRIEF LC-MS enables deep proteome coverage and unbiased proteogenomics. *Nat*  
591 *Methods.* 2014;11(1):59-62.
- 592 9. Holman JD, Tabb DL, Mallick P. Employing ProteoWizard to Convert Raw  
593 Mass Spectrometry Data. *Curr Protoc Bioinformatics.* 2014;46:13.24.1-9.
- 594 10. Kim S, Pevzner PA. MS-GF+ makes progress towards a universal database  
595 search tool for proteomics. *Nature Communications.* 2014;5(1):5277.
- 596 11. Granholm V, Kim S, Navarro JCF, Sjölund E, Smith RD, Käll L. Fast and  
597 Accurate Database Searches with MS-GF+Percolator. *Journal of Proteome Research.*  
598 2014;13(2):890-7.
- 599 12. Boekel J, Chilton JM, Cooke IR, Horvatovich PL, Jagtap PD, Käll L, et al.  
600 Multi-omic data analysis using Galaxy. *Nat Biotechnol.* 2015;33(2):137-9.
- 601 13. Boekel J. Nextflow ddamsproteomics github [updated 2020-09-25. Available  
602 from: <https://github.com/lehtiolab/ddamsproteomics#readme>.
- 603 14. Röst HL, Sachsenberg T, Aiche S, Bielow C, Weissner H, Aicheler F, et al.  
604 OpenMS: a flexible open-source software platform for mass spectrometry data analysis. *Nat*  
605 *Methods.* 2016;13(9):741-8.
- 606 15. Savitski MM, Wilhelm M, Hahne H, Kuster B, Bantscheff M. A Scalable  
607 Approach for Protein False Discovery Rate Estimation in Large Proteomic Data Sets.  
608 *Molecular & cellular proteomics : MCP.* 2015;14(9):2394-404.
- 609 16. Pearson K. LIII. On lines and planes of closest fit to systems of points in space.  
610 *The London, Edinburgh, and Dublin Philosophical Magazine and Journal of Science.*  
611 1901;2(11):559-72.
- 612 17. Hotelling H. Analysis of a complex of statistical variables into principal  
613 components. *Journal of Educational Psychology.* 1933;24(6):417-41.
- 614 18. Jolliffe IT. *Principal component analysis.* New-York: Springer-Verlag; 2002.

- 615 19. Van der Maaten L, Hinton G. Visualizing data using t-SNE. *Journal of machine*  
616 *learning research*. 2008;9(11).
- 617 20. Van Der Maaten L. Accelerating t-SNE using tree-based algorithms. *The*  
618 *Journal of Machine Learning Research*. 2014;15(1):3221-45.
- 619 21. Eisen MB, Spellman PT, Brown PO, Botstein D. Cluster analysis and display of  
620 genome-wide expression patterns. *Proceedings of the National Academy of Sciences*.  
621 1998;95(25):14863-8.
- 622 22. Benjamini Y, Hochberg Y. Controlling the false discovery rate: a practical and  
623 powerful approach to multiple testing. *J R Stat Soc B*. 1995;57:289-300.
- 624 23. Eden E, Lipson D, Yogev S, Yakhini Z. Discovering Motifs in Ranked Lists of  
625 DNA Sequences. *PLOS Computational Biology*. 2007;3(3):e39.
- 626 24. Eden E, Navon R, Steinfeld I, Lipson D, Yakhini Z. GOrilla: a tool for  
627 discovery and visualization of enriched GO terms in ranked gene lists. *BMC Bioinformatics*.  
628 2009;10(1):48.
- 629 25. Kovaka S, Zimin AV, Pertea GM, Razaghi R, Salzberg SL, Pertea M.  
630 Transcriptome assembly from long-read RNA-seq alignments with StringTie2. *Genome*  
631 *Biology*. 2019;20(1):278.
- 632 26. Cock PJ, Antao T, Chang JT, Chapman BA, Cox CJ, Dalke A, et al. Biopython:  
633 freely available Python tools for computational molecular biology and bioinformatics.  
634 *Bioinformatics*. 2009;25(11):1422-3.
- 635 27. Consortium TU. UniProt: a worldwide hub of protein knowledge. *Nucleic Acids*  
636 *Res*. 2018;47(D1):D506-D15.
- 637 28. Frankish A, Diekhans M, Ferreira AM, Johnson R, Jungreis I, Loveland J, et al.  
638 GENCODE reference annotation for the human and mouse genomes. *Nucleic Acids Res*.  
639 2019;47(D1):D766-d73.
- 640 29. McLaren W, Gil L, Hunt SE, Riat HS, Ritchie GR, Thormann A, et al. The  
641 Ensembl Variant Effect Predictor. *Genome Biol*. 2016;17(1):122.
- 642 30. Zhu Y, Orre LM, Johansson HJ, Huss M, Boekel J, Vesterlund M, et al.  
643 Discovery of coding regions in the human genome by integrated proteogenomics analysis  
644 workflow. *Nat Commun*. 2018;9(1):903.
- 645 31. Kent WJ, Sugnet CW, Furey TS, Roskin KM, Pringle TH, Zahler AM, et al. The  
646 human genome browser at UCSC. *Genome Res*. 2002;12(6):996-1006.
- 647 32. Aasebø E, Berven FS, Hovland R, Døskeland SO, Bruserud Ø, Selheim F, et al.  
648 The Progression of Acute Myeloid Leukemia from First Diagnosis to Chemoresistant  
649 Relapse: A Comparison of Proteomic and Phosphoproteomic Profiles. *Cancers (Basel)*.  
650 2020;12(6).
